# Supplementary material for: Diagnostic Accuracy of Machine Learning Models on Mammography in Breast Cancer Classification: A Meta-Analysis
Source: MDPI journal article supplement (doi:10.3390/diagnostics12071643), 2022-07-05
Supplement: s1 [file s1]

Table S1. Result of influential diagnostic of overall machine learning models.

| Model              | AUC   | $\Delta$ AUC | Bootstrap 2.5th percentile | Bootstrap 97.5th percentile |
|--------------------|-------|--------------|----------------------------|-----------------------------|
| All model          | 0.898 |              |                            |                             |
| Excluding model 12 | 0.894 | -0.004       | -0.006                     | -0.006                      |
| Excluding model 4  | 0.895 | -0.003       | -0.004                     | -0.004                      |
| Excluding model 38 | 0.902 | 0.003        | -0.004                     | -0.004                      |
| Excluding model 10 | 0.895 | -0.003       | -0.005                     | -0.005                      |
| Excluding model 50 | 0.902 | 0.003        | -0.005                     | -0.005                      |
| Excluding model 52 | 0.901 | 0.003        | -0.005                     | -0.005                      |
| Excluding model 25 | 0.896 | -0.003       | -0.004                     | -0.004                      |
| Excluding model 49 | 0.901 | 0.003        | -0.005                     | -0.005                      |
| Excluding model 22 | 0.896 | -0.003       | -0.004                     | -0.004                      |
| Excluding model 39 | 0.901 | 0.003        | -0.003                     | -0.003                      |
| Excluding model 40 | 0.901 | 0.003        | -0.004                     | -0.004                      |
| Excluding model 33 | 0.901 | 0.003        | -0.004                     | -0.004                      |
| Excluding model 46 | 0.896 | -0.002       | -0.006                     | -0.006                      |
| Excluding model 59 | 0.896 | -0.002       | -0.003                     | -0.003                      |
| Excluding model 32 | 0.901 | 0.002        | -0.004                     | -0.004                      |
| Excluding model 3  | 0.896 | -0.002       | -0.003                     | -0.003                      |
| Excluding model 62 | 0.901 | 0.002        | -0.002                     | -0.002                      |
| Excluding model 58 | 0.896 | -0.002       | -0.003                     | -0.003                      |
| Excluding model 6  | 0.896 | -0.002       | -0.004                     | -0.004                      |
| Excluding model 48 | 0.9   | 0.002        | -0.004                     | -0.004                      |
| Excluding model 21 | 0.9   | 0.002        | -0.003                     | -0.003                      |
| Excluding model 36 | 0.897 | -0.002       | -0.004                     | -0.004                      |
| Excluding model 37 | 0.9   | 0.002        | -0.003                     | -0.003                      |
| Excluding model 24 | 0.897 | -0.002       | -0.005                     | -0.005                      |
| Excluding model 28 | 0.897 | -0.002       | -0.003                     | -0.003                      |
| Excluding model 45 | 0.9   | 0.002        | -0.002                     | -0.002                      |
| Excluding model 26 | 0.897 | -0.002       | -0.004                     | -0.004                      |
| Excluding model 35 | 0.9   | 0.002        | -0.004                     | -0.004                      |
| Excluding model 34 | 0.9   | 0.002        | -0.004                     | -0.004                      |
| Excluding model 63 | 0.9   | 0.002        | -0.002                     | -0.002                      |
| Excluding model 44 | 0.9   | 0.002        | -0.002                     | -0.002                      |
| Excluding model 30 | 0.897 | -0.002       | -0.003                     | -0.003                      |
| Excluding model 66 | 0.897 | -0.002       | -0.004                     | -0.004                      |
| Excluding model 11 | 0.897 | -0.001       | -0.005                     | -0.005                      |
| Excluding model 18 | 0.9   | 0.001        | -0.004                     | -0.004                      |
| Excluding model 54 | 0.897 | -0.001       | -0.002                     | -0.002                      |
| Excluding model 2  | 0.897 | -0.001       | -0.003                     | -0.003                      |
| Excluding model 8  | 0.9   | 0.001        | -0.004                     | -0.004                      |
| Excluding model 17 | 0.9   | 0.001        | -0.003                     | -0.003                      |
| Excluding model 55 | 0.897 | -0.001       | -0.002                     | -0.002                      |
| Excluding model 47 | 0.897 | -0.001       | -0.005                     | -0.005                      |
| Excluding model 1  | 0.9   | 0.001        | -0.002                     | -0.002                      |
| Excluding model 20 | 0.9   | 0.001        | -0.003                     | -0.003                      |
| Excluding model 53 | 0.9   | 0.001        | -0.005                     | -0.005                      |
| Excluding model 64 | 0.897 | -0.001       | -0.002                     | -0.002                      |
| Excluding model 7  | 0.899 | 0.001        | -0.004                     | -0.004                      |

|                    |       |        |        |        |
|--------------------|-------|--------|--------|--------|
| Excluding model 65 | 0.898 | -0.001 | -0.002 | -0.002 |
| Excluding model 23 | 0.898 | -0.001 | -0.002 | -0.002 |
| Excluding model 19 | 0.899 | 0.001  | -0.004 | -0.004 |
| Excluding model 9  | 0.898 | -0.001 | -0.002 | -0.002 |
| Excluding model 31 | 0.898 | -0.001 | -0.004 | -0.004 |
| Excluding model 67 | 0.898 | -0.001 | -0.002 | -0.002 |
| Excluding model 42 | 0.899 | 0.001  | -0.002 | -0.002 |
| Excluding model 27 | 0.899 | 0.001  | -0.003 | -0.003 |
| Excluding model 13 | 0.899 | 0      | -0.006 | -0.006 |
| Excluding model 15 | 0.898 | 0      | -0.002 | -0.002 |
| Excluding model 43 | 0.898 | 0      | -0.002 | -0.002 |
| Excluding model 57 | 0.898 | 0      | -0.002 | -0.002 |
| Excluding model 14 | 0.899 | 0      | -0.005 | -0.005 |
| Excluding model 16 | 0.898 | 0      | -0.003 | -0.003 |
| Excluding model 29 | 0.899 | 0      | -0.003 | -0.003 |
| Excluding model 56 | 0.898 | 0      | -0.002 | -0.002 |
| Excluding model 60 | 0.898 | 0      | -0.002 | -0.002 |
| Excluding model 61 | 0.899 | 0      | -0.002 | -0.002 |
| Excluding model 41 | 0.898 | 0      | -0.005 | -0.005 |
| Excluding model 68 | 0.899 | 0      | -0.002 | -0.002 |
| Excluding model 5  | 0.899 | 0      | -0.002 | -0.002 |
| Excluding model 51 | 0.899 | 0      | -0.005 | -0.005 |

---
